# Supplementary material for: Simple, rapid and sensitive detection of Parkinson's disease related alpha-synuclein using a DNA aptamer assisted liquid crystal biosensor
Source: Royal Society of Chemistry journal article supplement (doi:10.1039/d1sm00298h), 2021-01-01
Supplement: d1sm00298h1.pdf [file d1sm00298h1.pdf]

## Electronic Supplementary Information (ESI)

### **Simple, Rapid and Sensitive Detection of Parkinson's Disease Related Alpha-Synuclein by DNA Aptamer Assisted Liquid Crystal Biosensor**

Xiuxiu Yang,<sup>a</sup> Xiaofang Zhao,<sup>b</sup> Fengwei Liu,<sup>b</sup> Haiyu Li,<sup>a</sup> Claire Xi Zhang<sup>\*b</sup> and Zhongqiang Yang<sup>\*a</sup>

<sup>a</sup>*Key Laboratory of Organic Optoelectronics and Molecular Engineering of the Ministry of Education, Department of Chemistry, Tsinghua University, Beijing 100084, China.*

<sup>b</sup>*Beijing Institute of Brain Disorders, Laboratory of Brain Disorders, Ministry of Science and Technology, Collaborative Innovation Center for Brain Disorders, Capital Medical University, Beijing 100069, China.*

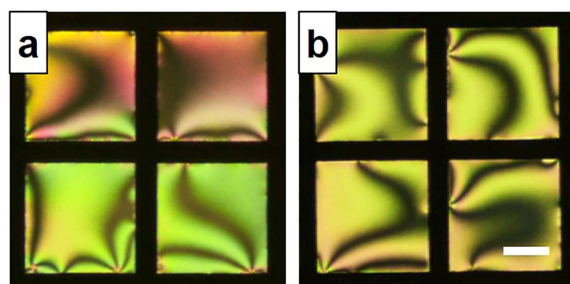

**Fig. S1** Optical images (crossed polars) of LC-aqueous interface in the presence of 30  $\mu\text{L}$  (a) PBS buffer or (b) 0.75  $\mu\text{M}$  DNA aptamer for 10 min, respectively. The scale bar is 100  $\mu\text{m}$ .

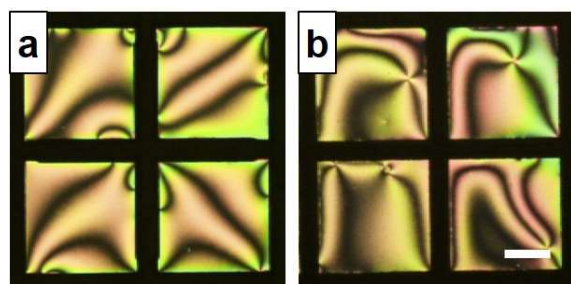

**Fig. S2** Optical images (crossed polars) of LC-aqueous interface in the presence of 30  $\mu\text{L}$  (a) PBS buffer or (b) 100 pM  $\alpha\text{S}$  for 10 min, respectively. The scale bar is 100  $\mu\text{m}$ .

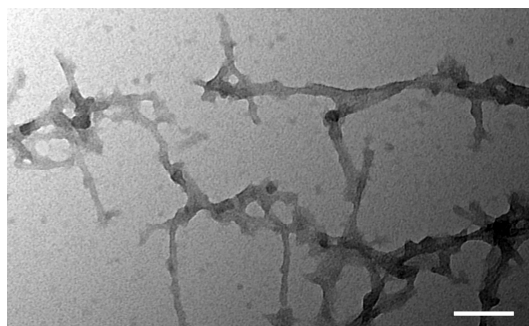

**Fig. S3** The transmission electron microscopy characterization of  $\alpha$ S fibrils. The scale bar is 100 nm.

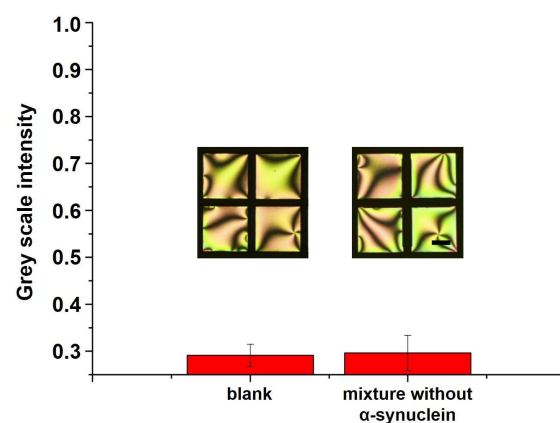

**Fig. S4** Grey scale intensity of blank, 100 pM mixture of proteins ( $\alpha$ S,  $\alpha$ S fibril, BSA,  $\alpha$ -chymotrypsinogen A,  $\alpha$ -lactalbumin and lysozyme at equal ratio) without  $\alpha$ S and corresponding optical images (crossed polars). The scale bar is 100  $\mu$ m.

### Matlab Code Used for Characterization of Grey Scale Intensity

```
file_path = 'C: '; % Image folder path
img_path_list = dir(strcat(file_path, '*.jpg')); % Get all JPG images in this folder
img_num = length(img_path_list); % Total number of images
Result_Value = zeros(img_num,1); % Preset blank array to give gray value of image
addpath(file_path);
i = 1; % Cycle the gray level of each image and assign it to the cells in the corresponding array
while i <= img_num
    Orig_Picture = imread (img_path_list(i).name); % Read image
    Gray_Picture = im2bw(Orig_Picture,0.2); % Graying color images
    Light_Pixel_Num = nnz (Gray_Picture); % Count the number of pixels in the non-blank area
    [ m, n] = size(Gray_Picture); % Measure the length and width pixel size of gray image
    Picture_Pixel_Num = m * n; % Number of pixels in grayscale image
    Result_Value(i,1) = Light_Pixel_Num / Picture_Pixel_Num; % Calculate the proportion of
    non-blank area in the image
    i= i + 1;
end
```
